# Supplementary material
Source: publisher figshare collection journal article supplement (https://tandf.figshare.com/ndownloader/files/15129206)
Supplement: Supplementary file 1 [file 15129206]

**Supplementary Material**

**Oxidation-precipitation of magnetic Fe3O4/AC nanocomposite as a heterogeneous catalyst for electro-Fenton treatment**

Pegah Nazaria, Neda Askaria, Shahrbanoo Rahman Setayesha*

aDepartment of Chemistry, Sharif University of Technology, Azadi Avenue, Tehran, PO Box 11155-3516, Iran

*Corresponding author Telephone: +98-21-66165338, E-mail: [setayesh@sharif.edu](mailto:setayesh@sharif.edu)

**Synthesis of Fe3O4 NPs**

4.000 g of iron (II) sulfate heptahydrate and 1.800 g of sodium nitrate were dissolved in 200 ml of double distilled water and the solution was deoxygenated using Ar gas. After 20 min, the resulted solution was heated to 333 K and 20 ml ammonium hydroxide (28%) was added dropwise, under vigorous stirring. The temperature was kept at 333 K for 1 h. The mixture was cooled to room temperature and the solid was collected by a magnetic bar. The precipitate was washed with double distilled water until reaching pH=7 and dried in vacuum oven at 353 K for 12 h.


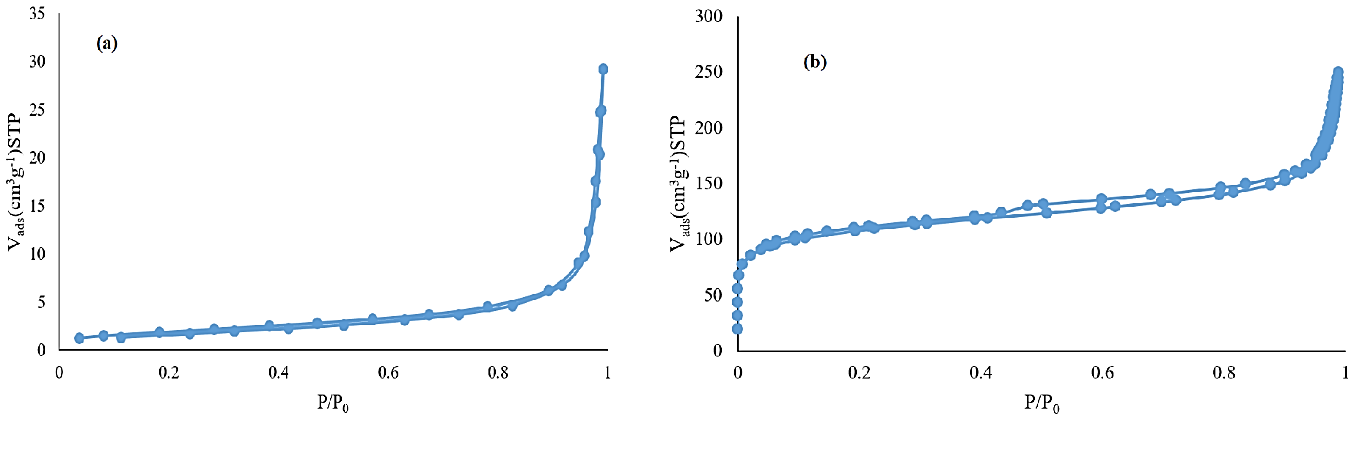


**Figure S1.** Nitrogen adsorption/desorption isotherms for (a) Fe3O4 and (b) Fe3O4/AC


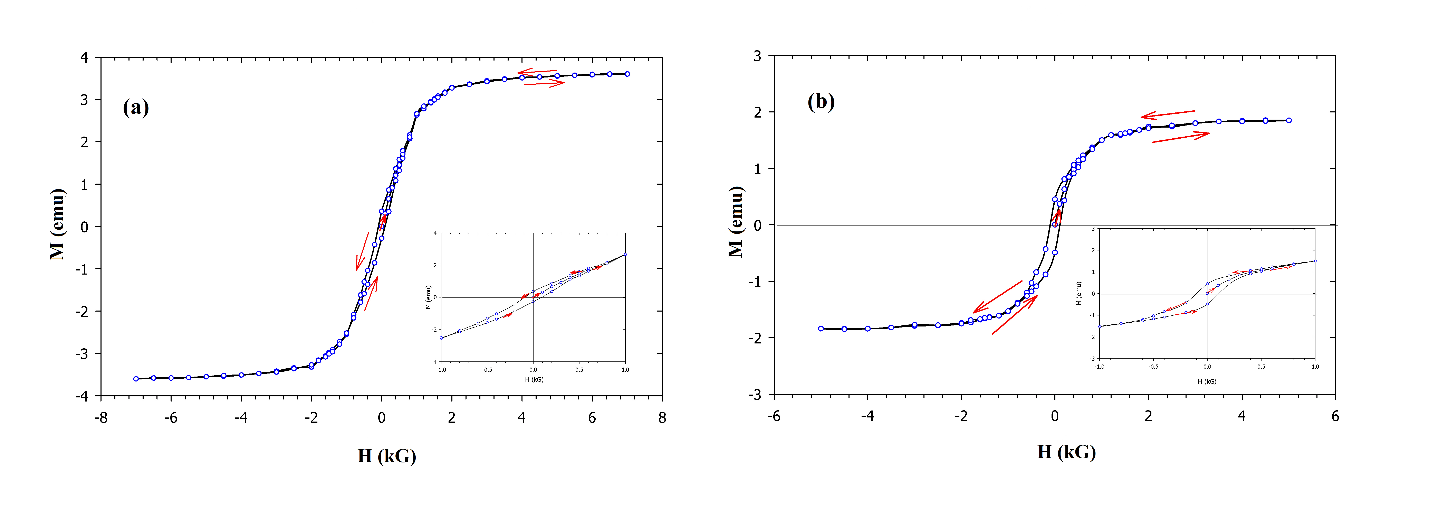


**Figure S2.** The magnetization hysteresis loops of (a) Fe3O4 and (b) Fe3O4/AC


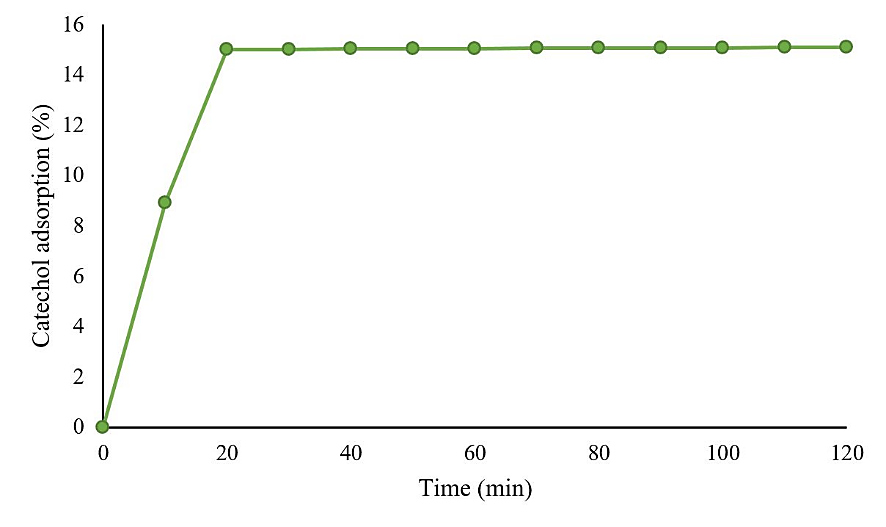


**Figure S3.** Catechol adsorption on the surface of catalyst before EF reaction (pH 3, Fe3O4/AC: 1.2 g L-1, Catechol: 1.0 × 10-3 mol L-1)


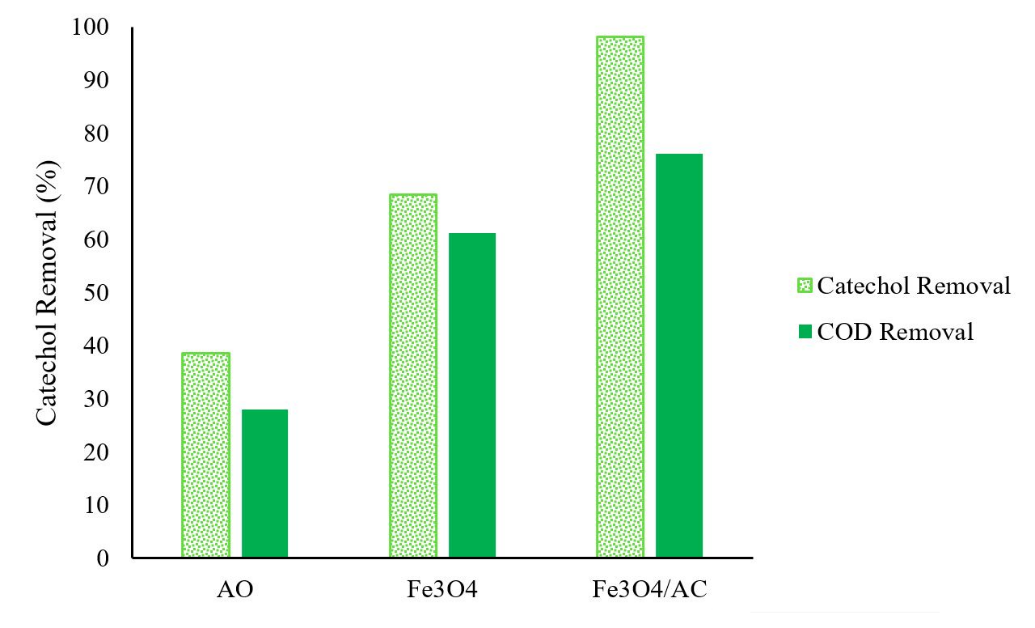


**Figure S4.** Catechol removal by various processes at the optimum conditions (pH 3, Fe3O4/AC: 0.9 g L-1, Na2SO4: 0.05 mol L-1, Catechol: 8.0×10-4 mol L-1 at I: 120 mA)


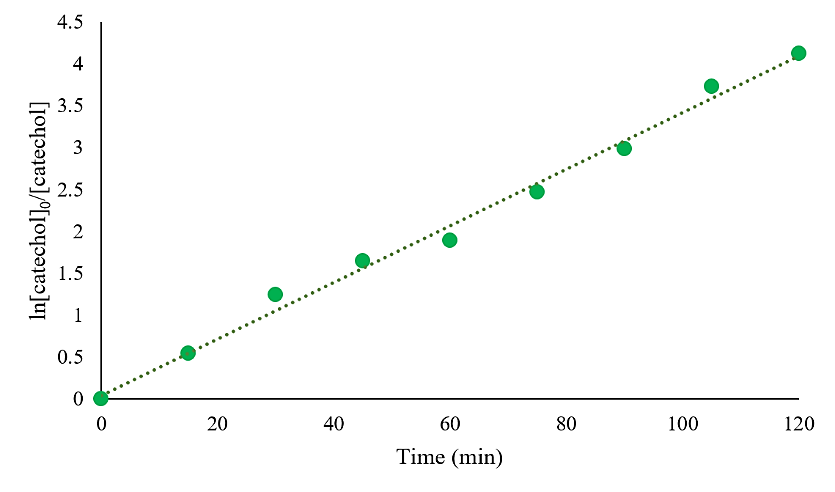


**Figure S5.** Plot of ln ([catechol]0/[catechol]) versus time for catechol removal at the optimized condition (pH 3, Fe3O4/AC : 0.9 g L-1, Na2SO4: 0.05 mol L-1, Catechol: 8.0×10-4 mol L-1 at 120 mA)


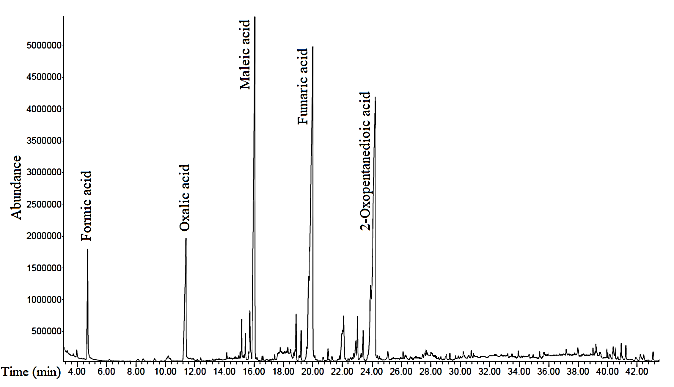


**Figure S6.** GC-MS chromatogram of sample after 90 min EF degradation of catechol (pH 3, Fe3O4/AC: 0.9 g L-1, Na2SO4: 0.05 mol L-1, Catechol: 8.0×10-4 mol L-1 at 120 mA)
